# Supplementary material for: Heterogeneity in endothelial cells and widespread venous arterialization during early vascular development in mammals
Source: PubMed Central journal article supplement (PMC8975889; doi:10.1038/s41422-022-00615-z), 2022-01-25
Supplement: 41422_2022_615_MOESM3_ESM.pdf [file 41422_2022_615_MOESM3_ESM.pdf]

**Fig. S3**

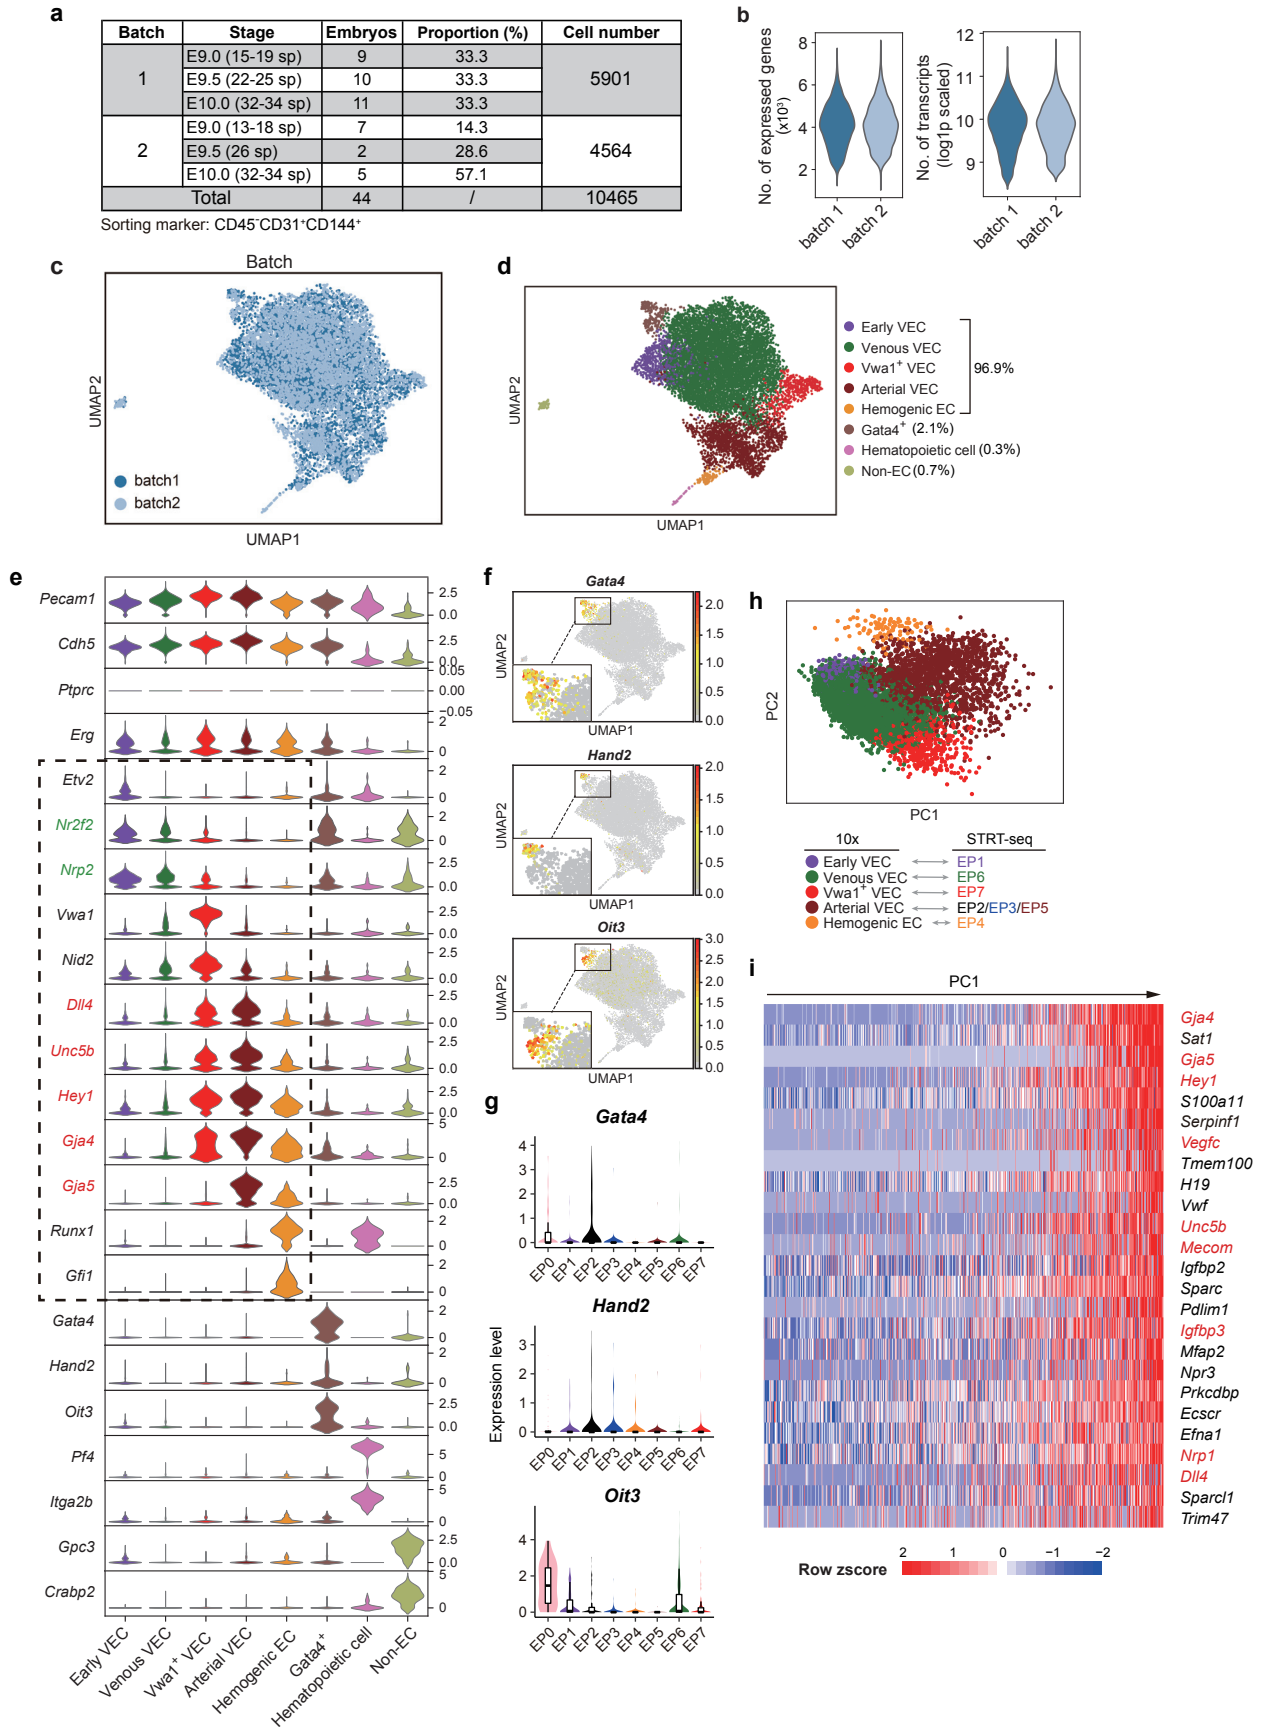

**Fig. S3. Validation of principal VEC populations using alternative sequencing strategy.**

**a**, Embryo and cell information of two biological replicates for 10x Genomics scRNA-seq. VECs were collected from embryos proper and purified by FACS.

**b**, Violin plots showing the number of genes (left) and transcripts (right) in each single cell of two different replicates from 10x Genomics scRNA-seq data.

**c**, UMAP plot showing cells from two biological replicates are evenly merged well, and no batch effect is detected from 10x Genomics scRNA-seq data.

**d**, UMAP plot with eight clusters from 10x Genomics scRNA-seq data identified by unsupervised clustering with louvain algorithm mapped on it. The constitutions of different populations are shown.

**e**, Violin plots showing expression levels of sorting markers and representative feature genes of eight clusters from 10x Genomics scRNA-seq data. Known arterial and venous genes are indicated in red and green, respectively. The dotted box indicates the VEC clusters within the scope of our concern.

**f**, UMAP plot from 10x Genomics scRNA-seq data with the expression levels of selected genes mapped onto it, showing that Gata4<sup>+</sup> cluster could be subdivided into two sub-clusters which likely involved cardiac (Hand2<sup>+</sup>) and liver (Oit3<sup>+</sup>) VECs.

**g**, Violin plots showing the expression of selected genes in the eight embryo proper VEC clusters identified in the well-based RNA-sequencing dataset. Note seldom Gata4<sup>+</sup> expression in any clusters.

**h**, PCA plot of five VEC clusters within our concern from 10x Genomics scRNA-seq data. Corresponding populations in the STRT-seq dataset are indicated to the right.

**i**, Heatmap showing the expression of top 25 PC1 genes along PC1 axis from 10x Genomics scRNA-seq data. Known arterial genes are indicated in red validating the arterial properties of the arterial VEC and Vwa1<sup>+</sup> VEC clusters.
