# Supplementary material for: Heterogeneity in endothelial cells and widespread venous arterialization during early vascular development in mammals
Source: PubMed Central journal article supplement (PMC8975889; doi:10.1038/s41422-022-00615-z), 2022-01-25
Supplement: 41422_2022_615_MOESM4_ESM.pdf [file 41422_2022_615_MOESM4_ESM.pdf]

Fig. S4

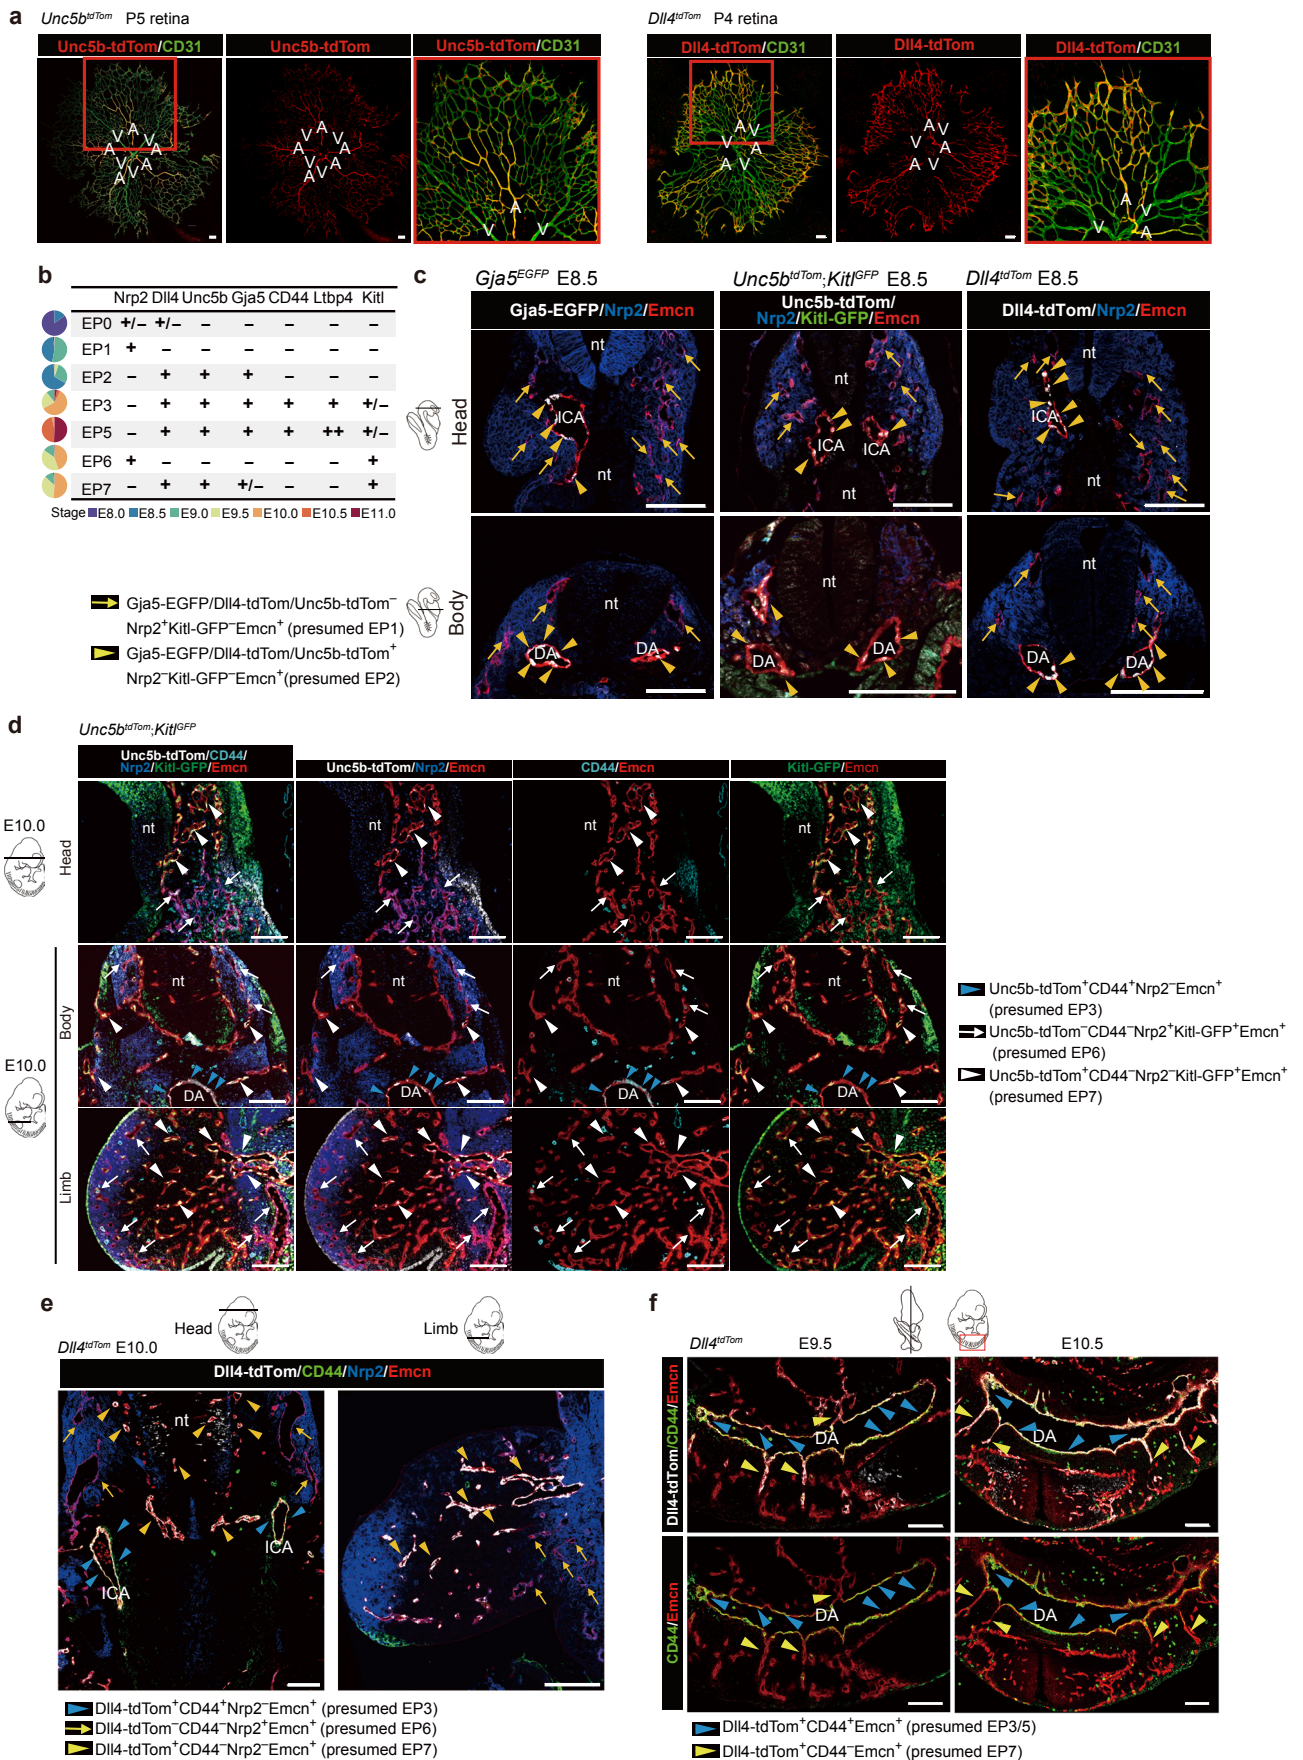

**Fig. S4. Anatomical localization of distinct vascular VEC populations.**

**a**, Confocal images of RFP (red) and CD31 (green) double immunostaining on the postnatal day 5 (P5) *Unc5b-tdTomato* (left) and P4 *Dll4-tdTomato* (right) mouse retinas. Representative images with higher magnification are shown to the right. Note that *Dll4-tdTom* was clearly expressed in the arteries and their branches and also in the vascular front and *Unc5b-tdTom* was mainly confined to the arteries. A, artery; V, vein. Scale bars, 100  $\mu$ m.

**b**, Table showing the expression indicator of key feature genes used in immunostaining for distinguishing seven VEC clusters. The Venn diagrams to the left represent the distribution of developmental stages for each of the embryo proper VEC cluster.

**c**, Representative immunostaining on cross sections of E8.5 *Gja5-EGFP* (left), *Unc5b-tdTomato;Kitl-GFP* (middle) and *Dll4-tdTomato* (right) embryos at head and body part. Arrows indicate the presumed EP1 ( $Gja5-EGFP/Dll4-tdTom^{-}Nrp2^{+}Emcn^{+}$  or  $Unc5b-tdTom^{-}Nrp2^{+}Kitl-GFP^{-}Emcn^{+}$ ) located at vascular plexus. Arrowheads indicate the presumed EP2 ( $Gja5-EGFP/Dll4-tdom^{+}Nrp2^{-}Emcn^{+}$  or  $Unc5b-tdTom^{+}Nrp2^{-}Kitl-GFP^{-}Emcn^{+}$ ) exclusively located at major arteries including DAs and ICAs at E8.5. The expression of *Kitl-GFP* is undetectable in the VECs at this early stage. The diagram to the left indicates the positions of sections. nt, neural tube; DA, dorsal aorta; ICA, internal carotid artery. Scale bars, 100  $\mu$ m.

**d**, Representative immunostaining on cross sections of E10.0 *Unc5b-tdTomato;Kitl-GFP* embryos. Blue arrowheads indicate the presumed EP3, white arrows indicate the presumed EP6, and white arrowheads indicate the presumed EP7. Note the localization of EP3 ( $Unc5b-tdTom^{+}CD44^{+}Nrp2^{-}Emcn^{+}$ , blue arrowheads) at known arteries such as DA, and EP7 ( $Dll4-tdTom^{+}CD44^{-}Nrp2^{-}Emcn^{+}$ , white arrowheads) at vascular plexus adjacent to EP6 ( $Unc5b-tdTom^{-}CD44^{-}Nrp2^{+}Kitl-GFP^{+}Emcn^{+}$ , white arrows). EP6 and EP7 were widely distributed throughout the whole embryo, including the perineural vascular plexus, vascular sprouts within the neural tube, and capillaries in the limb buds. The diagrams to the left indicate the positions of sections. nt, neural tube; DA, dorsal aorta; Scale bars, 100  $\mu$ m.

**e**, Representative immunostaining on cross sections of E10.0 *Dll4-tdTomato* embryos at head (left) and limb (right) regions. Note the localization of major artery VECs ( $Dll4-tdTom^{+}CD44^{+}Nrp2^{-}Emcn^{+}$ , blue arrowheads) at known arteries such as ICA, EP6 VECs ( $Dll4-tdTom^{-}CD44^{-}Nrp2^{+}Emcn^{+}$ , yellow arrows) at vascular plexus, and EP7 VECs ( $Dll4-tdTom^{+}CD44^{-}Nrp2^{-}Emcn^{+}$ , yellow arrowheads) at vascular plexus adjacent to EP6. The diagram above indicates the position of sections. nt, neural tube; ICA, internal carotid artery. Scale bars, 100  $\mu$ m.

**f**, Representative immunostaining on sagittal sections at E9.5 and E10.5 aortic region of *Dll4-tdTomato* embryos. Blue arrowheads indicate major artery VECs ( $Dll4-tdTom^{+}CD44^{+}$  or  $Dll4-tdTom^{+}CD44^{+}Nrp2^{-}$ ) located at DAs. Yellow arrowheads indicate artery plexus VECs ( $Dll4-tdTom^{+}CD44^{-}$  or  $Dll4-tdTom^{+}CD44^{-}Nrp2^{-}$ ) as the extension of DAs. The diagrams above indicate the positions of sections and imaging. DA, dorsal aorta. Scale bars, 100  $\mu$ m.
