# Supplementary material for: Heterogeneity in endothelial cells and widespread venous arterialization during early vascular development in mammals
Source: PubMed Central journal article supplement (PMC8975889; doi:10.1038/s41422-022-00615-z), 2022-01-25
Supplement: 41422_2022_615_MOESM6_ESM.pdf [file 41422_2022_615_MOESM6_ESM.pdf]

**Fig. S6**

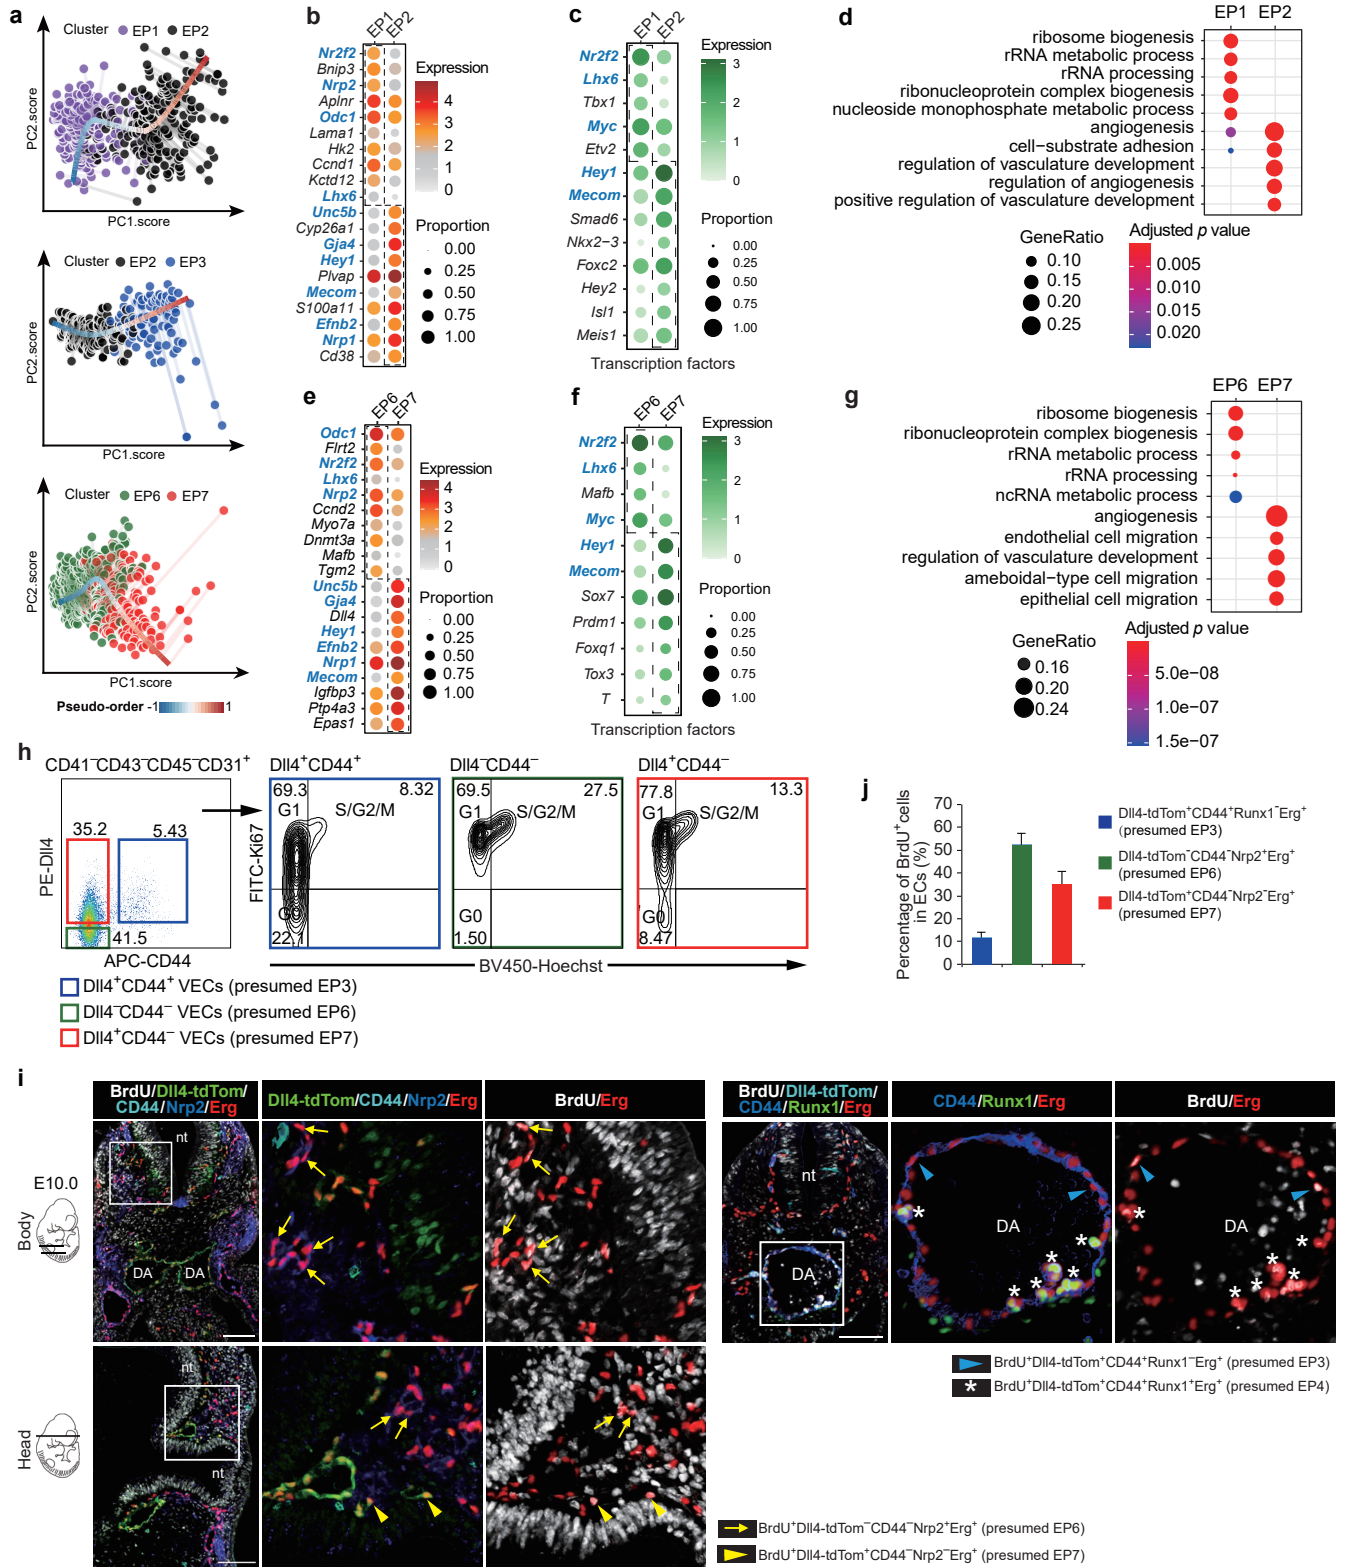

**Fig. S6. Molecular features of different arterial VEC populations.**

**a**, PCA plots with the pseudo-order inferred by fitting a principal curve to the top two dimensions from PCA of EP1 and EP2 (upper), EP2 and EP3 (middle), and EP6 and EP7 (lower).

**b**, Dot plot showing the average expression levels and cell expressing proportions of top ten DEGs between EP1 and EP2. Dot color indicates the average expression level within a cluster and dot size represents the number of genes within a cluster. The DEGs shared with (e) are indicated in blue.

**c**, Dot plot showing the differentially expressed transcription factors between EP1 and EP2. The transcription factors shared with (f) are indicated in blue.

**d**, Dot plot showing the top five enriched Gene Ontology biological process terms for EP1 and EP2. Dot color indicates the statistical significance of the enrichment and dot size represents the fraction of genes annotated to each term.

**e**, Dot plot showing the differentially expressed top ten genes between EP6 and EP7 which are similar to those between EP2 and EP1 (b). The DEGs shared with (b) are indicated in blue.

**f**, Dot plot showing the differentially expressed transcription factors between EP6 and EP7 which are similar to those between EP2 and EP1 (c). The transcription factors shared with (c) are indicated in blue.

**g**, Dot plot showing the enriched Gene Ontology biological process terms of EP6 and EP7 which are similar to those between EP2 and EP1 (d). Dot color indicates statistical significance of the enrichment and dot size represents the fraction of genes annotated to each term.

**h**, Representative FACS analysis showing the proliferation status of distinct VEC populations. Data are representative of 2 independent experiments. The presumed EP3 ( $Dll4^+CD44^+$ , blue boxes), EP6 ( $Dll4^-CD44^-$ , green boxes), and EP7 ( $Dll4^+CD44^-$ , red boxes) are indicated. Representative plots to the right showing the expression of Hoechst and Ki67 in the indicated VEC populations.

**i**, Representative immunostaining on cross sections of E10.0 *Dll4-tdTomato* embryos with BrdU injection 0.5 hours prior to cell sample collection. Arrows indicate the BrdU<sup>+</sup> vein & venous plexus VECs ( $Dll4-tdTom^-CD44^-Nrp2^+Erg^+$ ), yellow arrowheads indicate the BrdU<sup>+</sup> artery plexus VECs ( $Dll4-tdTom^+CD44^-Nrp2^+Erg^+$ ), blue arrowheads indicate the BrdU<sup>+</sup> major artery VECs ( $Dll4-tdTom^+CD44^+Nrp2^-Erg^+$ ), and asterisks indicate the BrdU<sup>+</sup> hemogenic endothelial cells ( $Dll4-tdTom^+CD44^+Runx1^+Erg^+$ ). Images in white boxes show inserts at high magnification. The diagram to the left indicates the positions of sections. nt, neural tube; DA, dorsal aortae. Scale bars, 100  $\mu$ m.

**j**, Bar charts showing the proportion of BrdU<sup>+</sup> VECs in the indicated embryo proper VEC clusters. Notice that the different proliferation status of distinct VEC populations are consistent with the computational (Fig. 3c) and flow cytometric analysis (h). 651 cells of EP3 from 12 sections, 2721 cells of EP6 from 12 sections, and 1778 cells of EP7 from 12 sections were measured respectively.
